# Supplementary material for: Facile synthesis of Zn0.5Cd0.5S nanosheets with tunable S vacancies for highly efficient photocatalytic hydrogen evolution
Source: Royal Society of Chemistry journal article supplement (doi:10.1039/d3nr06419k), 2024-01-01
Supplement: d3nr06419k1.pdf [file d3nr06419k1.pdf]

## Facile synthesis of Zn<sub>0.5</sub>Cd<sub>0.5</sub>S nanosheets with tunable S vacancies for highly efficient photocatalytic hydrogen evolution

Linfen Yang <sup>a, b</sup>, Yuhua Wang <sup>c\*</sup> and Yong Peng <sup>a, b\*</sup>

<sup>a</sup> Department of Materials Science, School of Physical Science and Technology, Lanzhou University, Lanzhou, 730000, China

<sup>b</sup> School of Materials and Energy, or Electron Microscopy Centre of Lanzhou University, Lanzhou, 730000, China

<sup>c</sup> School of Materials and Energy, Lanzhou University, Lanzhou, 730000, China

\*Corresponding author: Prof. Yuhua Wang or Prof. Yong Peng.

Tel: +86-931-8912772; Fax: +86-931-8913554

E-mail address: wyh@lzu.edu.cn, or pengy@lzu.edu.cn.

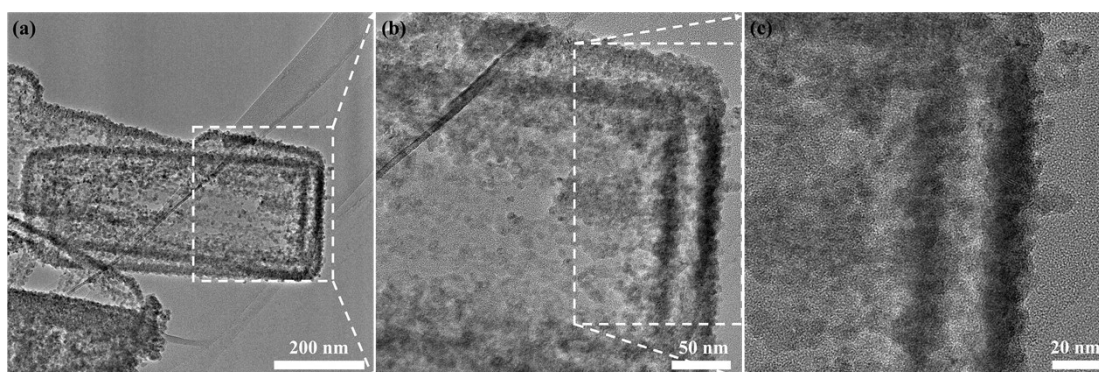

**Fig. S1.** The TEM images of ZCS4 sample.

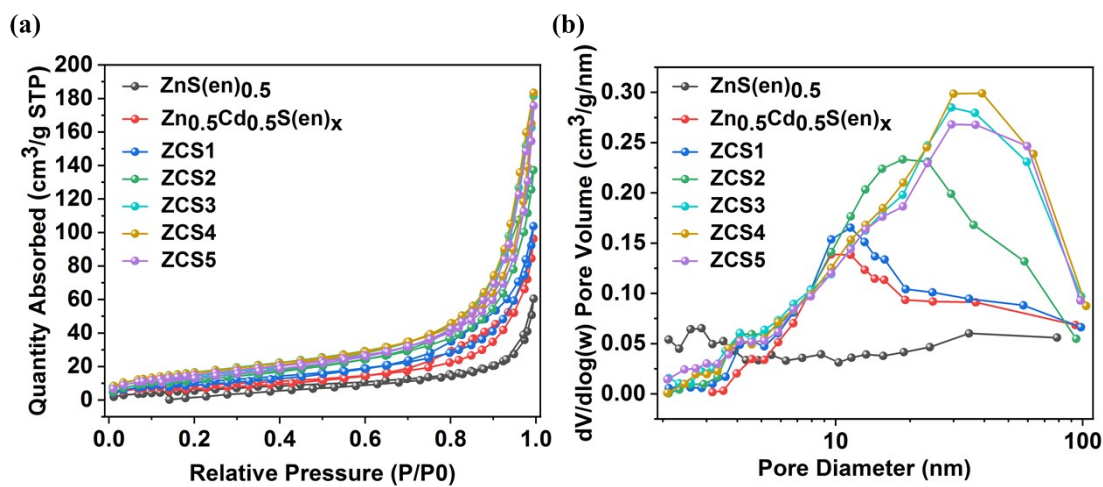

Fig. S2 (a)  $N_2$  adsorption-desorption isotherms and (b) pore-size distributions.

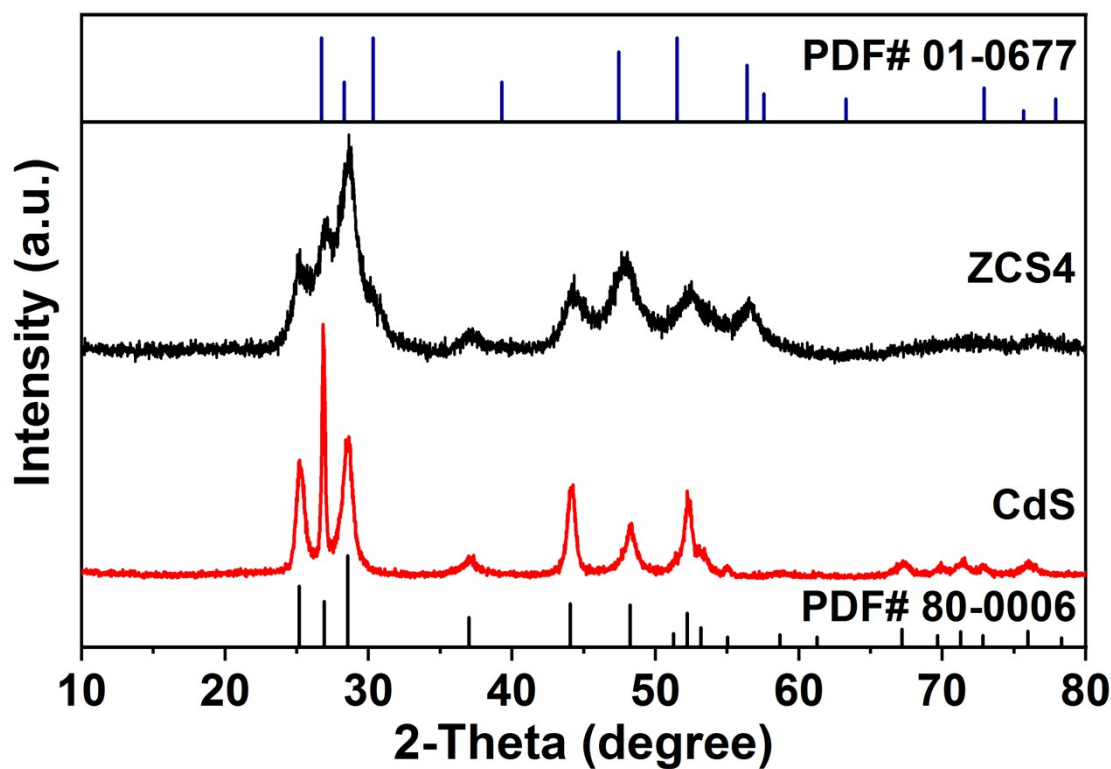

Fig. S3 XRD patterns of ZCS4 and pure CdS.

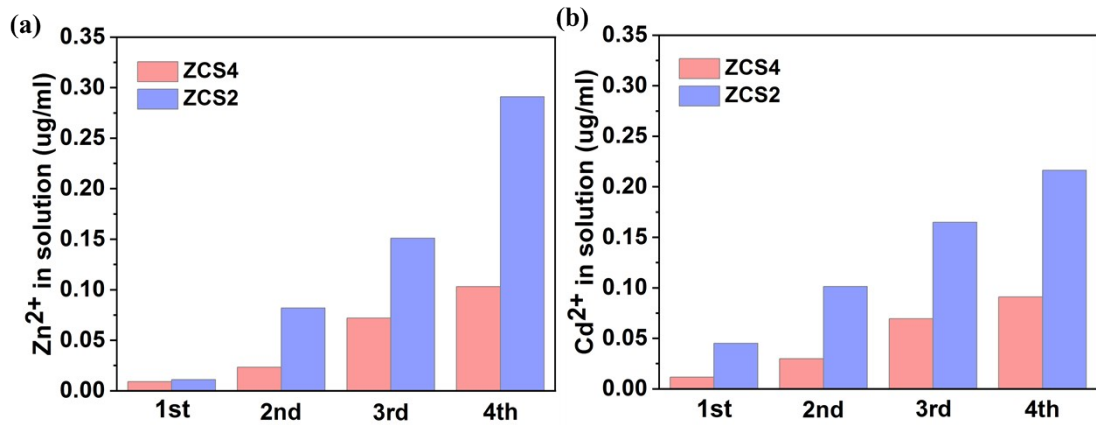

**Fig. S4** The concentration of Zn ion and Cd ion in aqueous solution after each cycle test of ZCS2 (a) and ZCS4 (b) samples.

**Table S1** BET surface areas, average pore sizes, and pore volumes of the as-prepared samples

| Sample                                                 | BET surface area<br>(cm <sup>3</sup> /g) | Average pore size<br>(nm) | Pore volume<br>(cm <sup>3</sup> /g) |
|--------------------------------------------------------|------------------------------------------|---------------------------|-------------------------------------|
| ZnS(en) <sub>0.5</sub>                                 | 22.41                                    | 10.8434                   | 0.112728                            |
| Zn <sub>0.5</sub> Cd <sub>0.5</sub> S(en) <sub>x</sub> | 32.11                                    | 16.5592                   | 0.160451                            |
| ZCS1                                                   | 39.88                                    | 14.7021                   | 0.172961                            |
| ZCS2                                                   | 50.28                                    | 15.0421                   | 0.227717                            |
| ZCS3                                                   | 61.11                                    | 18.1254                   | 0.297113                            |
| ZCS4                                                   | 62.22                                    | 17.6030                   | 0.299233                            |
| ZCS5                                                   | 56.59                                    | 17.3052                   | 0.288918                            |
